# Supplementary material
Source: publisher figshare collection journal article supplement (https://tandf.figshare.com/articles/dataset/_/24223272)
Supplement: Supplementary file 1 [file 1]

Archive with 2 entries (2 files):
- rjpa_a_2253295_sm7133.xlsx
- rjpa_a_2253295_sm7132.pdf
