# Supplementary material
Source: publisher figshare collection journal article supplement (https://tandf.figshare.com/articles/dataset/_/24223272)
Supplement: Supplementary file 1 [file 1 › rjpa_a_2253295_sm7133.xlsx]

## Sheet: Contents Page
Index	Short Title	Title	Description
1	Wilcox Rank Sum	Wilcox Rank Sum Test 2 Groups (Ranked Variables)	Significant results of Wilcox Rank Sum Tests to compare responses to 5 and 8 point scale questions between different sub-groups of respondents based on demographic characteristics. Includes responses from all countries.
2	Kruskal-Wallis	Kruskal-Wallis 3+ Groups (Rank Variables)	Significant results of Kruskal-Wallis Tests to compare responses to 5 and 8 point scale questions between different sub-groups of respondents based on demographic characteristics. Includes responses from all countries.
3	Chi Square (2 Groups)	Chi Square 2 Groups (Categorical Variables)	Significant results of chi-square tests to compare responses to categorical questions between two different sub-groups of respondents based on demographic characteristics. Includes responses from all countries.
4	Chi Square (3+ Groups)	Chi Square 3+ Groups (Categorical Variables)	Significant results of chi-square tests to compare responses to categorical questions between three or more different sub-groups of respondents based on demographic characteristics. Includes responses from all countries.
5	SW MCA Eigenvalues	Software Usage Multiple Correspondence Analysis (MCA) - Eigenvalues	Eigenvalues of dimensions identified in the Multiple Correspondence Analysis (MCA) of Software Usage
6	SW MCA Dim1	Software Usage MCA - Summary of Dimension 1	Summary of contribution and statistical significance of contributing and supplementary variables for Dimension 1 of the MCA of software usage
7	SW MCA Dim2	Software Usage MCA - Summary of Dimension 2	Summary of contribution and statistical significance of contributing and supplementary variables for Dimension 2 of the MCA of software usage
8	D MCA Eigenvalues	Data Usage Multiple Correspondence Analysis (MCA) - Eigenvalues	Eigenvalues of dimensions identified in the Multiple Correspondence Analysis (MCA) of Data Usage
9	D MCA Dim1	Data Usage MCA - Summary of Dimension 1	Summary of contribution and statistical significance of contributing and supplementary variables for Dimension 1 of the MCA of data usage
10	D MCA Dim2	Data Usage MCA - Summary of Dimension 2	Summary of contribution and statistical significance of contributing and supplementary variables for Dimension 2 of the MCA of data usage
Notes:
None of the questions on the survey were compulsory and some participants chose not to answer some questions, sometimes resulting in small differences in the number of responses within the same category.

## Sheet: 1 - Wilcox Rank Sum
Question Abbreviated	Low (1) Meaning	High (5 or 8) Meaning	Test Name	Group 1 Name	Group 1 Response No.	Group 1 Median	Group 1 Mean	Group 2 Name	Group 2 Response No.	Group 2 Median	Group 2 Mean	Wilcox Statistic	Wilcox pValue	Wilcox R
Q9 - Implementation Ease	Very easy	Very difficult	Public vs. Private Sector	public_sector	272	4	3.57	private_sector	224	3	2.92	40901	8.26377e-12	-0.306851
Q10 - Barriers - Costs And Resources	No impact	Large impact	Public vs. Private Sector	public_sector	285	4	3.993	private_sector	231	4	3.528	41293.5	2.10977e-07	-0.22845
Q10 - Barriers - Change Resistance	No impact	Large impact	Public vs. Private Sector	public_sector	284	4	3.525	private_sector	230	3	2.826	43779	7.30784e-12	-0.302207
Q10 - Barriers - Uncertainty And Risk	No impact	Large impact	Public vs. Private Sector	public_sector	284	3	3.377	private_sector	231	3	3.165	36131	0.0372849	-0.0917717
Q10 - Barriers - Poor Quality Technology	No impact	Large impact	Public vs. Private Sector	public_sector	284	3	3.461	private_sector	230	3	3	39789.5	1.0454e-05	-0.194409
Q13 - COVID Impact	No change	Complete change	Public vs. Private Sector	public_sector	282	4	3.642	private_sector	230	4	3.365	36833.5	0.00524148	-0.123382
Q24 - Learning Channels - LinkedIn	Most Important	Least Important	Public vs. Private Sector	public_sector	287	6	5.388	private_sector	232	5	4.529	11144	0.000924935	-0.145399
Q26 - Resources	strongly disagree	strongly agree	Public vs. Private Sector	public_sector	286	3	2.657	private_sector	231	3	3.056	26492	6.05417e-05	-0.17639
Q7 - Preparedness	Not at all prepared	Completely prepared	Men vs. Women	men	256	3	3.355	women	272	3	3.099	40341	0.00091583	-0.144275
Q24 - Learning Channels - Twitter	Most Important	Least Important	Men vs. Women	men	257	7	6.581	women	272	8	7	8435	0.0470043	-0.0863592
Q26 - Resources	strongly disagree	strongly agree	Men vs. Women	men	255	3	2.929	women	271	3	2.705	38170	0.0315581	-0.0937428
Q24 - Learning Channels - Other peer networks	Most Important	Least Important	Management vs. Staff	management	201	3	3.636	staff	309	4	4.152	6767	0.0182171	-0.104555
Q7 - Preparedness	Not at all prepared	Completely prepared	Strategic vs. Regulatory	strategic	200	3	3.175	dev. assessment	257	3	3.339	23045	0.046551	-0.0931052
Q16 - Consultation Accessibility	Much less accessible	Much more accessible	Strategic vs. Regulatory	strategic	188	4	3.872	dev. assessment	203	4	3.655	21691.5	0.0137858	-0.124549
Q24 - Learning Channels - Twitter	Most Important	Least Important	Strategic vs. Regulatory	strategic	200	7	6.347	dev. assessment	258	8	7.143	5834	0.000469785	-0.163424
Q5 - Anticipated Change	Not at all	Complete change	Database Management Yes vs. No	yes	215	4	3.963	no	339	4	3.684	43351	5.19922e-05	-0.171919
Q7 - Preparedness	Not at all prepared	Completely prepared	Database Management Yes vs. No	yes	215	3	3.409	no	339	3	3.127	42578.5	0.000440671	-0.149315
Q24 - Learning Channels - My workplace	Most Important	Least Important	Database Management Yes vs. No	yes	215	3	3.619	no	345	3	3.132	13017	0.040265	-0.0866714
Q24 - Learning Channels - Study tours	Most Important	Least Important	Database Management Yes vs. No	yes	215	7	6.308	no	345	6	5.99	13140.5	0.0257215	-0.0942512
Q26 - Resources	strongly disagree	strongly agree	Database Management Yes vs. No	yes	214	3	2.981	no	338	3	2.743	40186	0.0226716	-0.0969974
Q7 - Preparedness	Not at all prepared	Completely prepared	GIS Yes vs. No	yes	350	3	3.397	no	204	3	2.961	44278	6.90318e-07	-0.210903
Q24 - Learning Channels - My workplace	Most Important	Least Important	GIS Yes vs. No	yes	351	3	3.588	no	209	2	2.827	12878	0.00180133	-0.131894
Q24 - Learning Channels - Academic publications	Most Important	Least Important	GIS Yes vs. No	yes	351	5	4.608	no	209	5	5.22	7925	0.0127146	-0.105292
Q24 - Learning Channels - Postgraduate Study	Most Important	Least Important	GIS Yes vs. No	yes	351	6	5.994	no	209	7	6.45	7126.5	0.0233043	-0.0958578
Q5 - Anticipated Change	Not at all	Complete change	Programming Yes vs. No	yes	69	4	3.986	no	485	4	3.765	19110.5	0.0398525	-0.0873203
Q7 - Preparedness	Not at all prepared	Completely prepared	Programming Yes vs. No	yes	69	4	3.797	no	485	3	3.157	22832	2.52658e-07	-0.219046
Q8 - Preparedness Collaborators	Not at all prepared	Completely prepared	Programming Yes vs. No	yes	69	2	2.406	no	485	3	2.612	14276.5	0.0355265	-0.0893184
Q24 - Learning Channels - E-mail lists	Most Important	Least Important	Programming Yes vs. No	yes	69	5	4.733	no	491	4	3.807	4542.5	0.0296049	-0.0919248
Q24 - Learning Channels - Postgraduate Study	Most Important	Least Important	Programming Yes vs. No	yes	69	6	5.406	no	491	7	6.265	2689.5	0.00578637	-0.116616
Q26 - Resources	strongly disagree	strongly agree	Programming Yes vs. No	yes	69	3	3.087	no	483	3	2.799	19092.5	0.042515	-0.0863363
Q5 - Anticipated Change	Not at all	Complete change	Tech Procurement Yes vs. No	yes	95	4	3.937	no	459	4	3.763	24604.5	0.0338698	-0.0901389
Q7 - Preparedness	Not at all prepared	Completely prepared	Tech Procurement Yes vs. No	yes	94	4	3.766	no	460	3	3.128	29335.5	9.61106e-09	-0.243761
Q24 - Learning Channels - Other peer networks	Most Important	Least Important	Tech Procurement Yes vs. No	yes	95	3	3.467	no	465	4	4.075	4272	0.024387	-0.0951212
Q24 - Learning Channels - Twitter	Most Important	Least Important	Tech Procurement Yes vs. No	yes	95	7	6.347	no	465	8	6.821	4887	0.0231819	-0.0959429
Q26 - Resources	strongly disagree	strongly agree	Tech Procurement Yes vs. No	yes	95	3	3.2	no	457	3	2.759	26152.5	0.00114369	-0.138438
Q7 - Preparedness	Not at all prepared	Completely prepared	Greater than 10 years experience vs. less than 10 years	less than 10	119	3	3.361	more than 10	219	3	3.16	14721.5	0.038066	-0.112819
Q10 - Barriers - Change Resistance	No impact	Large impact	Greater than 10 years experience vs. less than 10 years	less than 10	118	4	3.415	more than 10	217	3	3.097	14819	0.0142698	-0.13388
Q24 - Learning Channels - Professional publications	Most Important	Least Important	Greater than 10 years experience vs. less than 10 years	less than 10	119	3	3.127	more than 10	219	2	2.473	4833.5	0.011526	-0.137414
Q24 - Learning Channels - Web searches	Most Important	Least Important	Greater than 10 years experience vs. less than 10 years	less than 10	119	4	3.754	more than 10	219	3	3.119	3926.5	0.0474746	-0.107809
Q24 - Learning Channels - Postgraduate Study	Most Important	Least Important	Greater than 10 years experience vs. less than 10 years	less than 10	119	6	5.579	more than 10	219	7	6.314	2195.5	0.00909579	-0.14188

## Sheet: 2 - Kruskal-Wallis
Question Abbreviated	Low (1) Meaning	High (5 or 8) Meaning	Test Name	Group 1 Name	Group 1 Response No.	Group 1 Median	Group 1 Mean	Group 2 Name	Group 2 Response No.	Group 2 Median	Group 2 Mean	Group 3 Name	Group 3 Response No.	Group 3 Median	Group 3 Mean	Group 4 Name	Group 4 Response No.	Group 4 Median	Group 4 Mean	Group 5 Name	Group 5 Response No.	Group 5 Median	Group 5 Mean	Kruskal-Wallis	Kruskal-Wallis p-value
Q9 - Implementation Ease	Very easy	Very difficult	Public vs. Private vs. Non Profit	public_sector	266	4	3.564	private_sector	209	3	2.89	non_profit	33	3	3.394									48.0416	3.69747e-11
Q10 - Barriers - Costs And Resources	No impact	Large impact	Public vs. Private vs. Non Profit	public_sector	279	4	3.993	private_sector	216	4	3.514	non_profit	34	4	4.059									28.8303	5.48998e-07
Q10 - Barriers - Change Resistance	No impact	Large impact	Public vs. Private vs. Non Profit	public_sector	278	4	3.507	private_sector	215	3	2.791	non_profit	34	4	3.647									51.8065	5.62796e-12
Q10 - Barriers - Uncertainty And Risk	No impact	Large impact	Public vs. Private vs. Non Profit	public_sector	278	3	3.371	private_sector	216	3	3.12	non_profit	34	4	3.588									8.82946	0.0120978
Q10 - Barriers - Poor Quality Technology	No impact	Large impact	Public vs. Private vs. Non Profit	public_sector	278	3	3.468	private_sector	215	3	2.963	non_profit	34	3	3.5									23.7081	7.10979e-06
Q13 - COVID Impact	No change	Complete change	Public vs. Private vs. Non Profit	public_sector	276	4	3.656	private_sector	215	4	3.34	non_profit	33	4	3.697									11.4393	0.00328088
Q24 - Learning Channels - Study tours	Most Important	Least Important	Public vs. Private vs. Non Profit	public_sector	281	6	6.171	private_sector	217	7	6.4	non_profit	34	5	5.176									9.93651	0.00695528
Q24 - Learning Channels - LinkedIn	Most Important	Least Important	Public vs. Private vs. Non Profit	public_sector	281	6	5.36	private_sector	217	5	4.589	non_profit	34	4	4.842									8.92532	0.0115316
Q26 - Resources	strongly disagree	strongly agree	Public vs. Private vs. Non Profit	public_sector	280	3	2.661	private_sector	216	3	3.051	non_profit	34	3	2.794									14.846	0.000597369
Q9 - Implementation Ease	Very easy	Very difficult	Surveyed Countries	Australia	160	3	3.438	New Zealand	149	3	3.067	United Kingdom	56	3	3.196	United States of America	65	3	3.277	Canada	84	3	3.369	12.1059	0.0165809
Q10 - Barriers - Costs And Resources	No impact	Large impact	Surveyed Countries	Australia	166	4	3.916	New Zealand	155	4	3.6	United Kingdom	57	4	3.842	United States of America	67	4	3.746	Canada	91	4	4	11.7409	0.0193861
Q10 - Barriers - Change Resistance	No impact	Large impact	Surveyed Countries	Australia	166	3	3.211	New Zealand	154	3	2.987	United Kingdom	57	3	3.386	United States of America	67	3	3.373	Canada	90	4	3.478	12.8658	0.0119506
Q16 - Consultation Accessibility	Much less accessible	Much more accessible	Surveyed Countries	Australia	139	4	3.763	New Zealand	122	4	3.623	United Kingdom	47	4	3.574	United States of America	62	4	3.935	Canada	87	4	3.92	11.1172	0.0252783
Q24 - Learning Channels - My workplace	Most Important	Least Important	Surveyed Countries	Australia	170	3	3.233	New Zealand	157	2	2.755	United Kingdom	58	3	4.097	United States of America	67	4	3.97	Canada	91	3	3.538	15.1913	0.00432041
Q24 - Learning Channels - Seminars and workshops	Most Important	Least Important	Surveyed Countries	Australia	170	3	3.052	New Zealand	157	3	2.651	United Kingdom	58	3	3.387	United States of America	67	2	2.485	Canada	91	2	2.37	12.1301	0.0164096
Q24 - Learning Channels - Conferences	Most Important	Least Important	Surveyed Countries	Australia	170	4	4.356	New Zealand	157	4	4.287	United Kingdom	58	4	4.483	United States of America	67	3	2.886	Canada	91	3	3.76	20.9188	0.000328632
Q24 - Learning Channels - Twitter	Most Important	Least Important	Surveyed Countries	Australia	170	7	6.859	New Zealand	157	8	7.239	United Kingdom	58	6	5.741	United States of America	67	8	6.861	Canada	91	7	6.314	16.8946	0.00202625
Q24 - Learning Channels - Facebook	Most Important	Least Important	Surveyed Countries	Australia	170	7	6.897	New Zealand	157	7	6.729	United Kingdom	58	8	7.333	United States of America	67	7	6.6	Canada	91	8	7.209	10.9146	0.0275406

## Sheet: 3 - Chi Square (2 Groups)
Question Abbreviated	Test Name	Group 1 Name	Group 1 Response No.	% of Group 1	Group 2 Name	Group 2 Response No.	% of Group 2	Chi-Square	Chi-Square p-value	Corrected Chi-Square	Corrected Chi-Square p-value
Q2A - Software - Presentations	Public vs. Private Sector	public_sector	257	89.547	private_sector	190	81.8966	6.28457	0.0121794	5.66058	0.0173504
Q2A - Software - Social Media Platforms	Public vs. Private Sector	public_sector	104	36.2369	private_sector	143	61.6379	33.1874	8.36921e-09	32.1768	1.40763e-08
Q2A - Software - Administrative Systems	Public vs. Private Sector	public_sector	151	52.6132	private_sector	74	31.8966	22.4206	2.19007e-06	21.585	3.38489e-06
Q2A - Software - Project Management	Public vs. Private Sector	public_sector	83	28.9199	private_sector	87	37.5	4.28797	0.038383	3.90727	0.0480775
Q2A - Software - Online Whiteboard	Public vs. Private Sector	public_sector	56	19.5122	private_sector	66	28.4483	5.69746	0.0169895	5.21132	0.0224403
Q2A - Software - Graphics And Design	Public vs. Private Sector	public_sector	98	34.1463	private_sector	103	44.3966	5.68041	0.0171554	5.25666	0.0218629
Q2B - Software - Geographic Information Systems	Public vs. Private Sector	public_sector	225	78.3972	private_sector	150	64.6552	12.085	0.000508297	11.4092	0.000730804
Q2B - Software - 3D Model Making	Public vs. Private Sector	public_sector	30	10.453	private_sector	49	21.1207	11.3136	0.000769409	10.5021	0.00119242
Q2B - Software - Augmented/Virtual Reality	Public vs. Private Sector	public_sector	2	0.696864	private_sector	8	3.44828	5.13962	0.0233858	3.7867	0.0516614
Q2C - Software - Development App. Management	Public vs. Private Sector	public_sector	130	45.2962	private_sector	54	23.2759	27.1845	1.84936e-07	26.2307	3.02961e-07
Q2C - Software - ePlans	Public vs. Private Sector	public_sector	124	43.2056	private_sector	137	59.0517	12.8862	0.000331016	12.2601	0.000462742
Q2C - Software - Building Information Modelling	Public vs. Private Sector	public_sector	9	3.13589	private_sector	16	6.89655	3.9573	0.0466685	3.17958	0.0745639
Q2D - Software - Machine Learning / AI	Public vs. Private Sector	public_sector	5	1.74216	private_sector	13	5.60345	5.71336	0.0168363	4.61822	0.031634
Q3A - Data - Development Reg. Or Policy	Public vs. Private Sector	public_sector	257	89.547	private_sector	225	96.9828	10.7136	0.00106352	9.61994	0.00192477
Q3A - Data - Property And Development Data	Public vs. Private Sector	public_sector	250	87.108	private_sector	217	93.5345	5.87708	0.0153392	5.18587	0.0227713
Q3B - Data - Cultural Heritage Data	Public vs. Private Sector	public_sector	185	64.4599	private_sector	171	73.7069	5.09211	0.0240349	4.67192	0.0306596
Q2 - Data Access - Internal GIS team	Public vs. Private Sector	public_sector	227	79.0941	private_sector	99	42.6724	72.8588	1.39267e-17	71.3079	3.05617e-17
Q3 - Data Access - Existing websites etc.	Public vs. Private Sector	public_sector	247	86.0627	private_sector	216	93.1034	6.60699	0.0101579	5.89579	0.0151771
Q29 - Institution - Local government	Public vs. Private Sector	public_sector	215	74.9129	private_sector	24	10.3448	215.287	9.65079e-49	212.695	3.54665e-48
Q29 - Institution - Regional government	Public vs. Private Sector	public_sector	24	8.36237	private_sector	9	3.87931	4.33048	0.0374357	3.61027	0.0574238
Q29 - Institution - State government	Public vs. Private Sector	public_sector	34	11.8467	private_sector	7	3.01724	13.7465	0.000209208	12.5598	0.000394144
Q29 - Institution - National or central government	Public vs. Private Sector	public_sector	23	8.01394	private_sector	5	2.15517	8.62799	0.00331036	7.51828	0.00610759
Q29 - Institution - Private sector	Public vs. Private Sector	public_sector	0	0	private_sector	232	100	519	6.98402e-115	514.962	5.27883e-114
Q29 - Institution - Not-for-profit or charity	Public vs. Private Sector	public_sector	5	1.74216	private_sector	11	4.74138	3.86247	0.0493775	2.92388	0.0872779
Q32 - Tech Experience Programming	Public vs. Private Sector	public_sector	25	8.7108	private_sector	34	14.6552	4.49924	0.0339099	3.92861	0.0474712
Q33 - Role - Development assessment	Public vs. Private Sector	public_sector	114	39.7213	private_sector	135	58.1897	17.5321	2.82505e-05	16.7999	4.15353e-05
Q33 - Role - Infrastructure planning	Public vs. Private Sector	public_sector	36	12.5436	private_sector	48	20.6897	6.27579	0.0122399	5.68965	0.0170653
Q2A - Software - Website Editing	Men vs. Women	men	53	20.6226	women	35	12.8676	5.73048	0.0166729	5.18492	0.0227837
Q2B - Software - Digital Twins / 3D City Viewers	Men vs. Women	men	27	10.5058	women	10	3.67647	9.4744	0.00208359	8.45364	0.00364314
Q2B - Software - 3D Model Making	Men vs. Women	men	53	20.6226	women	30	11.0294	9.19322	0.00242913	8.48232	0.00358614
Q2B - Software - Augmented/Virtual Reality	Men vs. Women	men	8	3.11284	women	2	0.735294	4.02762	0.0447611	2.84767	0.0915064
Q2C - Software - ePlans	Men vs. Women	men	114	44.358	women	145	53.3088	4.23665	0.0395602	3.88603	0.0486894
Q2C - Software - Building Information Modelling	Men vs. Women	men	18	7.00389	women	6	2.20588	7.02388	0.00804297	5.95974	0.0146362
Q2C - Software - Scenario and Forecasting	Men vs. Women	men	21	8.17121	women	8	2.94118	6.97586	0.00826163	6.00301	0.0142815
Q2C - Software - Development Feasibility	Men vs. Women	men	13	5.05837	women	5	1.83824	4.1688	0.0411749	3.24666	0.071569
Q2D - Software - Data Portals	Men vs. Women	men	123	47.8599	women	107	39.3382	3.9049	0.0481455	3.56583	0.0589802
Q2D - Software - Data Visualisation	Men vs. Women	men	59	22.9572	women	44	16.1765	3.87493	0.0490124	3.45454	0.0630784
Q2D - Software - Programming Languages	Men vs. Women	men	31	12.0623	women	14	5.14706	8.11912	0.00438008	7.25493	0.00707067
Q4 - Data Access - Own analysis	Men vs. Women	men	120	46.6926	women	93	34.1912	8.58639	0.00338685	8.07449	0.00448927
Q29 - Institution - Social enterprise	Men vs. Women	men	7	2.72374	women	0	0	7.50791	0.00614287	5.56683	0.0183039
Q32 - Teach Experience GIS	Men vs. Women	men	176	68.4825	women	162	59.5588	4.56136	0.0327011	4.18274	0.0408375
Q32 - Tech Experience Programming	Men vs. Women	men	47	18.2879	women	19	6.98529	15.4594	8.42963e-05	14.4417	0.000144568
Q32 - Tech Experience Procurement	Men vs. Women	men	55	21.4008	women	37	13.6029	5.5929	0.0180335	5.06329	0.0244377
Q33 - Role - Transport planning	Men vs. Women	men	37	14.3969	women	24	8.82353	4.02361	0.0448676	3.49583	0.0615236
Q33 - Role - Economic development	Men vs. Women	men	26	10.1167	women	15	5.51471	3.91428	0.0478775	3.29708	0.0694031
Q33 - Role - Infrastructure planning	Men vs. Women	men	52	20.2335	women	35	12.8676	5.21745	0.0223614	4.69518	0.0302473
Q33 - Role - Urban design	Men vs. Women	men	58	22.5681	women	43	15.8088	3.90834	0.0480471	3.48302	0.0620016
Q2A - Software - Word Processing	Management vs. Staff	management	196	97.5124	staff	308	99.6764	4.90493	0.0267802	3.22025	0.0727325
Q2A - Software - Presentations	Management vs. Staff	management	182	90.5473	staff	261	84.466	3.94667	0.0469641	3.43175	0.0639542
Q2A - Software - Social Media Platforms	Management vs. Staff	management	122	60.6965	staff	130	42.0712	16.901	3.93812e-05	16.1641	5.80852e-05
Q2A - Software - Website Editing	Management vs. Staff	management	48	23.8806	staff	38	12.2977	11.6545	0.000640488	10.8429	0.000991758
Q2B - Software - Digital Twins / 3D City Viewers	Management vs. Staff	management	25	12.4378	staff	15	4.85437	9.68946	0.00185328	8.66868	0.00323725
Q2B - Software - 3D Model Making	Management vs. Staff	management	46	22.8856	staff	39	12.6214	9.23779	0.00237071	8.51355	0.00352512
Q2C - Software - Building Information Modelling	Management vs. Staff	management	15	7.46269	staff	10	3.23625	4.66651	0.0307563	3.80391	0.051133
Q2C - Software - Scenario and Forecasting	Management vs. Staff	management	17	8.45771	staff	13	4.20712	3.9743	0.0461996	3.24362	0.0717021
Q3A - Data - Other	Management vs. Staff	management	20	9.95025	staff	12	3.8835	7.62184	0.00576658	6.62512	0.010055
Q3B - Data - Public Heath Data	Management vs. Staff	management	43	21.393	staff	39	12.6214	6.94436	0.00840839	6.3095	0.0120093
Q3B - Data - Other	Management vs. Staff	management	7	3.48259	staff	3	0.970874	3.99664	0.0455911	2.79683	0.0944507
Q1 - Data Access - External public agencies	Management vs. Staff	management	101	50.2488	staff	118	38.1877	7.23033	0.0071682	6.74646	0.00939341
Q29 - Institution - Local government	Management vs. Staff	management	71	35.3234	staff	144	46.6019	6.35289	0.011719	5.89879	0.0151513
Q29 - Institution - Private sector	Management vs. Staff	management	102	50.7463	staff	115	37.2168	9.11921	0.0025294	8.57414	0.00340972
Q29 - Institution - Not-for-profit or charity	Management vs. Staff	management	16	7.9602	staff	11	3.55987	4.7031	0.0301083	3.86641	0.0492619
Q32 - Tech Experience Procurement	Management vs. Staff	management	53	26.3682	staff	33	10.6796	21.3809	3.76504e-06	20.2765	6.702e-06
Q33 - Role - Natural area / Environmental	Management vs. Staff	management	44	21.8905	staff	44	14.2395	4.99314	0.0254481	4.47163	0.034462
Q33 - Role - Economic development	Management vs. Staff	management	22	10.9453	staff	16	5.17799	5.8741	0.0153652	5.06752	0.0243782
Q33 - Role - Urban design	Management vs. Staff	management	49	24.3781	staff	48	15.534	6.18462	0.0128865	5.62373	0.0177189
Q2A - Software - Spreadsheets	Strategic vs. Regulatory	strategic	194	97	dev. assessment	238	92.2481	4.75116	0.0292786	3.90515	0.0481384
Q2A - Software - Presentations	Strategic vs. Regulatory	strategic	193	96.5	dev. assessment	199	77.1318	34.2661	4.80686e-09	32.7137	1.06779e-08
Q2A - Software - Social Media Platforms	Strategic vs. Regulatory	strategic	114	57	dev. assessment	103	39.9225	13.1792	0.000283078	12.5031	0.00040628
Q2A - Software - Project Management	Strategic vs. Regulatory	strategic	75	37.5	dev. assessment	68	26.3566	6.51486	0.0106977	6.00627	0.0142551
Q2A - Software - Online Whiteboard	Strategic vs. Regulatory	strategic	69	34.5	dev. assessment	35	13.5659	28.1312	1.13366e-07	26.951	2.08674e-07
Q2A - Software - Website Editing	Strategic vs. Regulatory	strategic	49	24.5	dev. assessment	28	10.8527	15.0035	0.000107313	14.0435	0.000178626
Q2A - Software - Graphics And Design	Strategic vs. Regulatory	strategic	91	45.5	dev. assessment	84	32.5581	7.99253	0.00469708	7.45377	0.00633037
Q2B - Software - 3D Model Making	Strategic vs. Regulatory	strategic	41	20.5	dev. assessment	33	12.7907	4.94291	0.0261979	4.39019	0.0361462
Q2C - Software - Development App. Management	Strategic vs. Regulatory	strategic	56	28	dev. assessment	110	42.6357	10.4436	0.00123077	9.81981	0.00172643
Q2C - Software - ePlans	Strategic vs. Regulatory	strategic	77	38.5	dev. assessment	152	58.9147	18.7816	1.46578e-05	17.9738	2.23962e-05
Q2C - Software - Community Engagement	Strategic vs. Regulatory	strategic	79	39.5	dev. assessment	57	22.093	16.3519	5.26046e-05	15.5287	8.12625e-05
Q2C - Software - Scenario and Forecasting	Strategic vs. Regulatory	strategic	16	8	dev. assessment	8	3.10078	5.44589	0.0196144	4.50394	0.0338168
Q2D - Software - Data Portals	Strategic vs. Regulatory	strategic	103	51.5	dev. assessment	96	37.2093	9.36417	0.00221268	8.79159	0.00302622
Q2D - Software - Data Visualisation	Strategic vs. Regulatory	strategic	51	25.5	dev. assessment	35	13.5659	10.5209	0.00118031	9.75298	0.00179032
Q2D - Software - Programming Languages	Strategic vs. Regulatory	strategic	21	10.5	dev. assessment	12	4.65116	5.76436	0.0163544	4.92277	0.0265049
Q3A - Data - Development Reg. Or Policy	Strategic vs. Regulatory	strategic	182	91	dev. assessment	252	97.6744	10.1074	0.00147672	8.80799	0.00299914
Q3A - Data - Property And Development Data	Strategic vs. Regulatory	strategic	175	87.5	dev. assessment	246	95.3488	9.34635	0.0022343	8.31929	0.00392263
Q3A - Data - Real Estate Data	Strategic vs. Regulatory	strategic	100	50	dev. assessment	80	31.0078	17.0353	3.66907e-05	16.2485	5.55537e-05
Q3A - Data - Employment And Business Data	Strategic vs. Regulatory	strategic	107	53.5	dev. assessment	69	26.7442	34.0871	5.27002e-09	32.9656	9.38016e-09
Q3A - Data - Infrastructure And Utilities	Strategic vs. Regulatory	strategic	135	67.5	dev. assessment	143	55.4264	6.88453	0.00869447	6.38772	0.0114913
Q3A - Data - Transport And Mobility Data	Strategic vs. Regulatory	strategic	118	59	dev. assessment	115	44.5736	9.38188	0.0021914	8.81353	0.00299005
Q3A - Data - Iot Data	Strategic vs. Regulatory	strategic	38	19	dev. assessment	26	10.0775	7.46123	0.0063042	6.73745	0.00944094
Q3A - Data - Other	Strategic vs. Regulatory	strategic	17	8.5	dev. assessment	10	3.87597	4.34226	0.0371776	3.54875	0.0595904
Q3B - Data - Demographic Data	Strategic vs. Regulatory	strategic	178	89	dev. assessment	150	58.1395	52.7841	3.72308e-13	51.2768	8.02166e-13
Q3B - Data - Community Consultation	Strategic vs. Regulatory	strategic	139	69.5	dev. assessment	113	43.7984	30.0723	4.16243e-08	29.0427	7.08008e-08
Q3B - Data - First peoples/indigenous	Strategic vs. Regulatory	strategic	89	44.5	dev. assessment	84	32.5581	6.83547	0.00893653	6.33685	0.0118255
Q3B - Data - Social Media Data	Strategic vs. Regulatory	strategic	52	26	dev. assessment	40	15.5039	7.73222	0.0054244	7.09217	0.00774213
Q3B - Data - Public Heath Data	Strategic vs. Regulatory	strategic	43	21.5	dev. assessment	30	11.6279	8.19502	0.00420055	7.47477	0.00625695
Q3C - Data - Natural Hazards Data	Strategic vs. Regulatory	strategic	152	76	dev. assessment	232	89.9225	16.1208	5.9429e-05	15.1094	0.000101457
Q3C - Data - Climate Change Data	Strategic vs. Regulatory	strategic	107	53.5	dev. assessment	87	33.7209	18.0518	2.14972e-05	17.2508	3.27554e-05
Q2 - Data Access - Internal GIS team	Strategic vs. Regulatory	strategic	139	69.5	dev. assessment	151	58.5271	5.84048	0.0156616	5.37759	0.020397
Q4 - Data Access - Own analysis	Strategic vs. Regulatory	strategic	109	54.5	dev. assessment	73	28.2946	32.3085	1.31535e-08	31.2235	2.29968e-08
Q29 - Institution - State government	Strategic vs. Regulatory	strategic	22	11	dev. assessment	9	3.48837	10.0738	0.00150392	8.91862	0.00282277
Q29 - Institution - National or central government	Strategic vs. Regulatory	strategic	15	7.5	dev. assessment	4	1.55039	10.0294	0.00154062	8.58895	0.00338209
Q29 - Institution - Private sector	Strategic vs. Regulatory	strategic	60	30	dev. assessment	135	52.3256	22.9684	1.64688e-06	22.0643	2.63668e-06
Q29 - Institution - Social enterprise	Strategic vs. Regulatory	strategic	5	2.5	dev. assessment	1	0.387597	3.88847	0.0486186	2.42623	0.119319
Q29 - Institution - Academia	Strategic vs. Regulatory	strategic	15	7.5	dev. assessment	8	3.10078	4.57141	0.0325098	3.6956	0.0545562
Q32 - Tech Experience Programming	Strategic vs. Regulatory	strategic	30	15	dev. assessment	20	7.75194	6.08596	0.0136261	5.36349	0.0205626
Q33 - Role - Development assessment	Strategic vs. Regulatory	strategic	0	0	dev. assessment	258	100	458	1.30957e-101	453.944	9.99627e-101
Q33 - Role - Strategic planning / Policy	Strategic vs. Regulatory	strategic	200	100	dev. assessment	102	39.5349	183.398	8.78303e-42	180.715	3.3827e-41
Q2A - Software - Spreadsheets	Database Management Yes vs. No	yes	206	95.814	no	313	90.7246	5.05607	0.0245398	4.33385	0.0373617
Q2A - Software - Presentations	Database Management Yes vs. No	yes	193	89.7674	no	284	82.3188	5.82101	0.0158358	5.24596	0.0219978
Q2A - Software - Social Media Platforms	Database Management Yes vs. No	yes	116	53.9535	no	154	44.6377	4.60389	0.0318995	4.23834	0.0395208
Q2A - Software - Project Management	Database Management Yes vs. No	yes	87	40.4651	no	96	27.8261	9.61791	0.00192689	9.05198	0.00262411
Q2A - Software - Website Editing	Database Management Yes vs. No	yes	55	25.5814	no	40	11.5942	18.3963	1.79407e-05	17.4167	3.00173e-05
Q2A - Software - Graphics And Design	Database Management Yes vs. No	yes	102	47.4419	no	114	33.0435	11.5894	0.00066329	10.9897	0.000916207
Q2A - Software - Other	Database Management Yes vs. No	yes	57	26.5116	no	60	17.3913	6.66617	0.009826	6.12577	0.0133225
Q2B - Software - Geographic Information Systems	Database Management Yes vs. No	yes	171	79.5349	no	229	66.3768	11.237	0.000801829	10.6015	0.00112996
Q2B - Software - Other	Database Management Yes vs. No	yes	20	9.30233	no	15	4.34783	5.54904	0.0184908	4.73568	0.0295431
Q2C - Software - Community Engagement	Database Management Yes vs. No	yes	76	35.3488	no	88	25.5072	6.19494	0.0128116	5.72883	0.0166886
Q2C - Software - DisciplineAnalytical Software	Database Management Yes vs. No	yes	53	24.6512	no	43	12.4638	13.8509	0.000197902	13.0062	0.000310466
Q2C - Software - Building Information Modelling	Database Management Yes vs. No	yes	18	8.37209	no	10	2.89855	8.35435	0.00384764	7.24176	0.00712269
Q2C - Software - Scenario and Forecasting	Database Management Yes vs. No	yes	23	10.6977	no	9	2.6087	16.086	6.05287e-05	14.6197	0.000131532
Q2C - Software - Development Feasibility	Database Management Yes vs. No	yes	12	5.5814	no	7	2.02899	5.09966	0.0239306	4.07344	0.0435624
Q2C - Software - Automated Documents	Database Management Yes vs. No	yes	28	13.0233	no	27	7.82609	4.03948	0.0444476	3.47399	0.0623408
Q2C - Software - Other	Database Management Yes vs. No	yes	12	5.5814	no	7	2.02899	5.09966	0.0239306	4.07344	0.0435624
Q2D - Software - Data Portals	Database Management Yes vs. No	yes	112	52.093	no	131	37.971	10.7541	0.0010405	10.1868	0.00141447
Q2D - Software - Data Visualisation	Database Management Yes vs. No	yes	60	27.907	no	48	13.913	16.6634	4.46345e-05	15.7765	7.12819e-05
Q2D - Software - Programming Languages	Database Management Yes vs. No	yes	33	15.3488	no	15	4.34783	20.455	6.10497e-06	19.0753	1.2566e-05
Q2D - Software - Machine Learning / AI	Database Management Yes vs. No	yes	18	8.37209	no	3	0.869565	20.6563	5.49558e-06	18.63	1.58705e-05
Q3A - Data - Real Estate Data	Database Management Yes vs. No	yes	107	49.7674	no	110	31.8841	17.8481	2.39263e-05	17.1025	3.5415e-05
Q3A - Data - Employment And Business Data	Database Management Yes vs. No	yes	107	49.7674	no	114	33.0435	15.5072	8.21937e-05	14.815	0.000118588
Q3A - Data - Infrastructure And Utilities	Database Management Yes vs. No	yes	146	67.907	no	186	53.913	10.7461	0.00104497	10.1742	0.00142419
Q3A - Data - Transport And Mobility Data	Database Management Yes vs. No	yes	127	59.0698	no	156	45.2174	10.1678	0.00142913	9.62121	0.00192343
Q3A - Data - Iot Data	Database Management Yes vs. No	yes	48	22.3256	no	34	9.85507	16.4806	4.91512e-05	15.4979	8.25958e-05
Q3A - Data - Other	Database Management Yes vs. No	yes	20	9.30233	no	16	4.63768	4.79125	0.0286047	4.04717	0.0442456
Q3B - Data - Demographic Data	Database Management Yes vs. No	yes	168	78.1395	no	232	67.2464	7.70146	0.00551761	7.17695	0.00738463
Q3B - Data - Community Consultation	Database Management Yes vs. No	yes	129	60	no	172	49.8551	5.48374	0.0191941	5.08324	0.0241581
Q3B - Data - Social Media Data	Database Management Yes vs. No	yes	60	27.907	no	51	14.7826	14.356	0.000151298	13.542	0.000233278
Q3B - Data - Public Heath Data	Database Management Yes vs. No	yes	54	25.1163	no	40	11.5942	17.3388	3.12739e-05	16.3842	5.17138e-05
Q3B - Data - Other	Database Management Yes vs. No	yes	8	3.72093	no	4	1.15942	4.14454	0.0417691	3.013	0.0825994
Q3C - Data - Environmental Data	Database Management Yes vs. No	yes	181	84.186	no	259	75.0725	6.53416	0.0105822	6.00408	0.0142728
Q3C - Data - Climate Change Data	Database Management Yes vs. No	yes	99	46.0465	no	126	36.5217	4.99951	0.0253545	4.61108	0.031766
Q4 - Data Access - Own analysis	Database Management Yes vs. No	yes	118	54.8837	no	106	30.7246	32.2121	1.38226e-08	31.2133	2.31171e-08
Q1 - Data Access - Other	Database Management Yes vs. No	yes	10	4.65116	no	1	0.289855	13.0832	0.000297956	10.9164	0.000953154
Q29 - Institution - State government	Database Management Yes vs. No	yes	22	10.2326	no	19	5.50725	4.35868	0.0368208	3.6901	0.0547362
Q29 - Institution - Intergovernmental	Database Management Yes vs. No	yes	5	2.32558	no	0	0	8.09554	0.00443744	5.68072	0.0171524
Q29 - Institution - Other	Database Management Yes vs. No	yes	8	3.72093	no	3	0.869565	5.59224	0.0180402	4.20957	0.0401966
Q32 - Tech Experience Database	Database Management Yes vs. No	yes	215	100	no	0	0	560	8.40657e-124	555.78	6.95964e-123
Q32 - Teach Experience GIS	Database Management Yes vs. No	yes	173	80.4651	no	178	51.5942	47.1969	6.42028e-12	45.9707	1.20032e-11
Q32 - Tech Experience Programming	Database Management Yes vs. No	yes	50	23.2558	no	19	5.50725	38.6226	5.14198e-10	36.9972	1.183e-09
Q32 - Tech Experience Procurement	Database Management Yes vs. No	yes	64	29.7674	no	31	8.98551	40.6107	1.85782e-10	39.1488	3.92699e-10
Q33 - Role - Natural area / Environmental	Database Management Yes vs. No	yes	55	25.5814	no	39	11.3043	19.329	1.10025e-05	18.3204	1.86701e-05
Q33 - Role - Transport planning	Database Management Yes vs. No	yes	35	16.2791	no	28	8.11594	8.84019	0.00294668	8.04151	0.00457175
Q33 - Role - Infrastructure planning	Database Management Yes vs. No	yes	46	21.3953	no	45	13.0435	6.78889	0.00917269	6.18907	0.0128541
Q33 - Role - Other	Database Management Yes vs. No	yes	35	16.2791	no	30	8.69565	7.42432	0.0064348	6.70359	0.00962191
Q2A - Software - Spreadsheets	GIS Yes vs. No	yes	332	94.5869	no	187	89.4737	5.04751	0.0246613	4.32208	0.0376209
Q2A - Software - Presentations	GIS Yes vs. No	yes	309	88.0342	no	168	80.3828	6.07475	0.0137128	5.4838	0.0191935
Q2A - Software - Project Management	GIS Yes vs. No	yes	130	37.037	no	53	25.3589	8.12082	0.00437598	7.59866	0.00584118
Q2A - Software - Graphics And Design	GIS Yes vs. No	yes	167	47.5783	no	49	23.445	32.2007	1.39041e-08	31.1902	2.33944e-08
Q2A - Software - Other	GIS Yes vs. No	yes	85	24.2165	no	32	15.311	6.28594	0.0121699	5.75867	0.0164075
Q2B - Software - Online Mapping / Virtual Globe	GIS Yes vs. No	yes	325	92.5926	no	165	78.9474	22.3002	2.33183e-06	21.0701	4.42788e-06
Q2B - Software - Geographic Information Systems	GIS Yes vs. No	yes	291	82.906	no	109	52.1531	60.7062	6.62621e-15	59.2086	1.4181e-14
Q2B - Software - 3D Model Making	GIS Yes vs. No	yes	81	23.0769	no	10	4.78469	32.2078	1.38535e-08	30.8777	2.74811e-08
Q2B - Software - Other	GIS Yes vs. No	yes	28	7.97721	no	7	3.34928	4.78836	0.0286527	4.0311	0.0446689
Q2C - Software - DisciplineAnalytical Software	GIS Yes vs. No	yes	78	22.2222	no	18	8.61244	17.0826	3.57883e-05	16.1379	5.88936e-05
Q2C - Software - Scenario and Forecasting	GIS Yes vs. No	yes	27	7.69231	no	5	2.39234	6.82973	0.00896531	5.88144	0.0153013
Q2C - Software - Automated Documents	GIS Yes vs. No	yes	42	11.9658	no	13	6.2201	4.88288	0.0271244	4.25569	0.039119
Q2C - Software - Other	GIS Yes vs. No	yes	17	4.8433	no	2	0.956938	6.0364	0.0140138	4.90894	0.026718
Q2D - Software - Data Portals	GIS Yes vs. No	yes	176	50.1425	no	67	32.0574	17.4427	2.96094e-05	16.7142	4.34535e-05
Q2D - Software - Data Visualisation	GIS Yes vs. No	yes	88	25.0712	no	20	9.56938	20.223	6.89184e-06	19.2394	1.15307e-05
Q2D - Software - Programming Languages	GIS Yes vs. No	yes	42	11.9658	no	6	2.87081	13.8272	0.00020041	12.691	0.000367413
Q3A - Data - Real Estate Data	GIS Yes vs. No	yes	158	45.0142	no	59	28.2297	15.5492	8.03849e-05	14.8501	0.000116404
Q3A - Data - Employment And Business Data	GIS Yes vs. No	yes	158	45.0142	no	63	30.1435	12.1259	0.000497274	11.5114	0.000691713
Q3A - Data - Infrastructure And Utilities	GIS Yes vs. No	yes	230	65.5271	no	102	48.8038	15.1778	9.78463e-05	14.4929	0.000140689
Q3A - Data - Transport And Mobility Data	GIS Yes vs. No	yes	199	56.6952	no	84	40.1914	14.2739	0.000158044	13.6213	0.000223637
Q3A - Data - Iot Data	GIS Yes vs. No	yes	69	19.6581	no	13	6.2201	18.9265	1.35852e-05	17.8666	2.3694e-05
Q3B - Data - Demographic Data	GIS Yes vs. No	yes	278	79.2023	no	122	58.3732	27.8485	1.31198e-07	26.8372	2.21336e-07
Q3B - Data - Community Consultation	GIS Yes vs. No	yes	207	58.9744	no	94	44.9761	10.3258	0.00131182	9.7704	0.00177344
Q3B - Data - Social Media Data	GIS Yes vs. No	yes	83	23.6467	no	28	13.3971	8.65935	0.00325387	8.02643	0.00460996
Q3B - Data - Public Heath Data	GIS Yes vs. No	yes	78	22.2222	no	16	7.6555	19.8999	8.1604e-06	18.8707	1.39883e-05
Q3C - Data - Environmental Data	GIS Yes vs. No	yes	287	81.7664	no	153	73.2057	5.70191	0.0169465	5.20479	0.0225247
Q3C - Data - Natural Hazards Data	GIS Yes vs. No	yes	289	82.3362	no	151	72.2488	7.91706	0.00489707	7.32927	0.00678406
Q3C - Data - Climate Change Data	GIS Yes vs. No	yes	161	45.8689	no	64	30.622	12.6701	0.000371554	12.0437	0.000519687
Q2 - Data Access - Internal GIS team	GIS Yes vs. No	yes	237	67.5214	no	105	50.2392	16.4571	4.97632e-05	15.7382	7.27399e-05
Q4 - Data Access - Own analysis	GIS Yes vs. No	yes	178	50.7123	no	46	22.0096	44.9675	2.00328e-11	43.7795	3.67527e-11
Q29 - Institution - Academia	GIS Yes vs. No	yes	28	7.97721	no	4	1.91388	8.93882	0.00279173	7.84885	0.0050853
Q32 - Tech Experience Database	GIS Yes vs. No	yes	173	49.2877	no	42	20.0957	47.1969	6.42028e-12	45.9707	1.20032e-11
Q32 - Teach Experience GIS	GIS Yes vs. No	yes	351	100	no	0	0	560	8.40657e-124	555.733	7.12489e-123
Q32 - Tech Experience Programming	GIS Yes vs. No	yes	56	15.9544	no	13	6.2201	11.4901	0.000699696	10.6067	0.00112681
Q32 - Tech Experience Procurement	GIS Yes vs. No	yes	79	22.5071	no	16	7.6555	20.5122	5.9252e-06	19.4714	1.02115e-05
Q33 - Role - Strategic planning / Policy	GIS Yes vs. No	yes	202	57.5499	no	100	47.8469	4.96391	0.0258816	4.58106	0.0323272
Q33 - Role - Transport planning	GIS Yes vs. No	yes	47	13.3903	no	16	7.6555	4.31502	0.0377773	3.75975	0.0525003
Q33 - Role - Economic development	GIS Yes vs. No	yes	35	9.97151	no	7	3.34928	8.28077	0.00400672	7.35372	0.00669241
Q33 - Role - Infrastructure planning	GIS Yes vs. No	yes	67	19.0883	no	24	11.4833	5.56715	0.0183005	5.02236	0.025022
Q33 - Role - Urban design	GIS Yes vs. No	yes	79	22.5071	no	26	12.4402	8.71435	0.00315715	8.06607	0.00451018
Q2A - Software - Word Processing	Programming Yes vs. No	yes	65	94.2029	no	485	98.778	7.22035	0.00720817	4.84733	0.027689
Q2A - Software - Website Editing	Programming Yes vs. No	yes	19	27.5362	no	76	15.4786	6.24403	0.0124613	5.41739	0.0199371
Q2A - Software - Graphics And Design	Programming Yes vs. No	yes	35	50.7246	no	181	36.8635	4.9057	0.0267681	4.33814	0.0372677
Q2A - Software - Other	Programming Yes vs. No	yes	31	44.9275	no	86	17.5153	27.5054	1.56652e-07	25.8719	3.64843e-07
Q2B - Software - Online Mapping / Virtual Globe	Programming Yes vs. No	yes	55	79.7101	no	435	88.5947	4.36613	0.0366602	3.59161	0.0580721
Q2B - Software - 3D Model Making	Programming Yes vs. No	yes	22	31.8841	no	69	14.053	14.1339	0.000170251	12.854	0.000336755
Q2B - Software - Augmented/Virtual Reality	Programming Yes vs. No	yes	5	7.24638	no	7	1.42566	9.77484	0.00176917	7.19609	0.00730628
Q2B - Software - Other	Programming Yes vs. No	yes	9	13.0435	no	26	5.29532	6.19853	0.0127856	4.9467	0.0261405
Q2C - Software - DisciplineAnalytical Software	Programming Yes vs. No	yes	22	31.8841	no	74	15.0713	12.0395	0.000520851	10.8849	0.0009695
Q2C - Software - Building Information Modelling	Programming Yes vs. No	yes	12	17.3913	no	16	3.25866	25.4388	4.56649e-07	22.5505	2.04694e-06
Q2C - Software - Scenario and Forecasting	Programming Yes vs. No	yes	11	15.942	no	21	4.27699	15.2794	9.27203e-05	13.191	0.000281291
Q2D - Software - Data Portals	Programming Yes vs. No	yes	42	60.8696	no	201	40.9369	9.78555	0.00175888	8.9909	0.00271327
Q2D - Software - Data Visualisation	Programming Yes vs. No	yes	23	33.3333	no	85	17.3116	9.97642	0.00158557	8.97372	0.00273891
Q2D - Software - Programming Languages	Programming Yes vs. No	yes	29	42.029	no	19	3.86965	112.411	2.90408e-26	107.594	3.29804e-25
Q2D - Software - Machine Learning / AI	Programming Yes vs. No	yes	11	15.942	no	10	2.03666	32.4097	1.24859e-08	28.6717	8.57493e-08
Q3A - Data - Employment And Business Data	Programming Yes vs. No	yes	39	56.5217	no	182	37.0672	9.58447	0.0019623	8.78743	0.00303313
Q3A - Data - Infrastructure And Utilities	Programming Yes vs. No	yes	51	73.913	no	281	57.2301	6.97572	0.00826231	6.30168	0.0120623
Q3A - Data - Transport And Mobility Data	Programming Yes vs. No	yes	45	65.2174	no	238	48.4725	6.78605	0.00918732	6.13271	0.0132704
Q3A - Data - Iot Data	Programming Yes vs. No	yes	19	27.5362	no	63	12.831	10.467	0.00121524	9.32354	0.00226228
Q3B - Data - Demographic Data	Programming Yes vs. No	yes	58	84.058	no	342	69.6538	6.15059	0.0131368	5.46504	0.0194006
Q3B - Data - Public Heath Data	Programming Yes vs. No	yes	20	28.9855	no	74	15.0713	8.38538	0.00378251	7.41882	0.0064545
Q3B - Data - Other	Programming Yes vs. No	yes	4	5.7971	no	8	1.62933	5.01147	0.0251799	3.22098	0.0726999
Q3 - Data Access - Existing websites etc.	Programming Yes vs. No	yes	54	78.2609	no	438	89.2057	6.79302	0.0091515	5.80584	0.015973
Q4 - Data Access - Own analysis	Programming Yes vs. No	yes	52	75.3623	no	172	35.0305	41.004	1.51921e-10	39.3407	3.55945e-10
Q1 - Data Access - Other	Programming Yes vs. No	yes	5	7.24638	no	6	1.222	11.4019	0.000733678	8.48811	0.00357474
Q29 - Institution - Academia	Programming Yes vs. No	yes	10	14.4928	no	22	4.48065	11.256	0.000793648	9.47442	0.00208357
Q32 - Tech Experience Database	Programming Yes vs. No	yes	50	72.4638	no	165	33.6049	38.6226	5.14198e-10	36.9972	1.183e-09
Q32 - Teach Experience GIS	Programming Yes vs. No	yes	56	81.1594	no	295	60.0815	11.4901	0.000699696	10.6067	0.00112681
Q32 - Tech Experience Programming	Programming Yes vs. No	yes	69	100	no	0	0	560	8.40657e-124	550.782	8.50984e-122
Q32 - Tech Experience Procurement	Programming Yes vs. No	yes	30	43.4783	no	65	13.2383	39.274	3.68319e-10	37.1566	1.09015e-09
Q33 - Role - Development assessment	Programming Yes vs. No	yes	20	28.9855	no	238	48.4725	9.24659	0.00235934	8.47891	0.00359288
Q33 - Role - Transport planning	Programming Yes vs. No	yes	17	24.6377	no	46	9.36864	14.1269	0.000170887	12.6389	0.000377792
Q33 - Role - Infrastructure planning	Programming Yes vs. No	yes	17	24.6377	no	74	15.0713	4.06819	0.0436981	3.39563	0.0653695
Q2A - Software - Social Media Platforms	Tech Procurement Yes vs. No	yes	60	63.1579	no	210	45.1613	10.2326	0.00137984	9.52446	0.00202751
Q2A - Software - Administrative Systems	Tech Procurement Yes vs. No	yes	50	52.6316	no	183	39.3548	5.72326	0.0167416	5.18984	0.0227193
Q2A - Software - Project Management	Tech Procurement Yes vs. No	yes	52	54.7368	no	131	28.172	25.3038	4.89751e-07	24.1107	9.09551e-07
Q2A - Software - Online Whiteboard	Tech Procurement Yes vs. No	yes	30	31.5789	no	101	21.7204	4.27818	0.0386046	3.74574	0.0529421
Q2A - Software - Website Editing	Tech Procurement Yes vs. No	yes	34	35.7895	no	61	13.1183	28.7831	8.09565e-08	27.1961	1.83828e-07
Q2A - Software - Graphics And Design	Tech Procurement Yes vs. No	yes	49	51.5789	no	167	35.914	8.1698	0.00425936	7.52204	0.00609487
Q2A - Software - Other	Tech Procurement Yes vs. No	yes	35	36.8421	no	82	17.6344	17.6086	2.71354e-05	16.4657	4.95394e-05
Q2B - Software - Digital Twins / 3D City Viewers	Tech Procurement Yes vs. No	yes	12	12.6316	no	29	6.23656	4.75442	0.0292232	3.85865	0.04949
Q2B - Software - Geographic Information Systems	Tech Procurement Yes vs. No	yes	76	80	no	324	69.6774	4.11871	0.0424114	3.62843	0.0568003
Q2B - Software - 3D Model Making	Tech Procurement Yes vs. No	yes	25	26.3158	no	66	14.1935	8.51758	0.00351732	7.65014	0.00567679
Q2B - Software - Augmented/Virtual Reality	Tech Procurement Yes vs. No	yes	9	9.47368	no	3	0.645161	29.321	6.13272e-08	25.2619	5.00486e-07
Q2B - Software - Other	Tech Procurement Yes vs. No	yes	14	14.7368	no	21	4.51613	14.0637	0.000176722	12.3735	0.000435481
Q2C - Software - Building Information Modelling	Tech Procurement Yes vs. No	yes	10	10.5263	no	18	3.87097	7.35591	0.00668426	6.02151	0.0141326
Q2C - Software - Scenario and Forecasting	Tech Procurement Yes vs. No	yes	13	13.6842	no	19	4.08602	13.4884	0.000240047	11.7657	0.00060332
Q2D - Software - Data Portals	Tech Procurement Yes vs. No	yes	54	56.8421	no	189	40.6452	8.42491	0.00370115	7.77842	0.0052874
Q2D - Software - Data Visualisation	Tech Procurement Yes vs. No	yes	28	29.4737	no	80	17.2043	7.62865	0.00574482	6.86081	0.00881065
Q2D - Software - Programming Languages	Tech Procurement Yes vs. No	yes	15	15.7895	no	33	7.09677	7.60611	0.00581708	6.53733	0.0105634
Q2D - Software - Machine Learning / AI	Tech Procurement Yes vs. No	yes	8	8.42105	no	13	2.7957	6.91602	0.00854269	5.44528	0.0196212
Q2D - Software - Other	Tech Procurement Yes vs. No	yes	8	8.42105	no	10	2.15054	9.97009	0.00159103	8.05635	0.00453444
Q3A - Data - Employment And Business Data	Tech Procurement Yes vs. No	yes	47	49.4737	no	174	37.4194	4.79798	0.0284931	4.30667	0.0379632
Q3A - Data - Infrastructure And Utilities	Tech Procurement Yes vs. No	yes	69	72.6316	no	263	56.5591	8.44219	0.00366614	7.78946	0.00525519
Q3A - Data - Iot Data	Tech Procurement Yes vs. No	yes	24	25.2632	no	58	12.4731	10.3244	0.0013128	9.32649	0.00225864
Q3B - Data - Social Media Data	Tech Procurement Yes vs. No	yes	30	31.5789	no	81	17.4194	9.95169	0.00160702	9.08067	0.00258325
Q3B - Data - Public Heath Data	Tech Procurement Yes vs. No	yes	31	32.6316	no	63	13.5484	20.5661	5.7606e-06	19.2226	1.16326e-05
Q4 - Data Access - Own analysis	Tech Procurement Yes vs. No	yes	53	55.7895	no	171	36.7742	11.8846	0.000566015	11.1055	0.000860743
Q29 - Institution - Regional government	Tech Procurement Yes vs. No	yes	10	10.5263	no	23	4.94624	4.42915	0.03533	3.48008	0.0621116
Q29 - Institution - State government	Tech Procurement Yes vs. No	yes	13	13.6842	no	28	6.02151	6.82618	0.00898313	5.74359	0.0165489
Q32 - Tech Experience Database	Tech Procurement Yes vs. No	yes	64	67.3684	no	151	32.4731	40.6107	1.85782e-10	39.1488	3.92699e-10
Q32 - Teach Experience GIS	Tech Procurement Yes vs. No	yes	79	83.1579	no	272	58.4946	20.5122	5.9252e-06	19.4714	1.02115e-05
Q32 - Tech Experience Programming	Tech Procurement Yes vs. No	yes	30	31.5789	no	39	8.3871	39.274	3.68319e-10	37.1566	1.09015e-09
Q32 - Tech Experience Procurement	Tech Procurement Yes vs. No	yes	95	100	no	0	0	560	8.40657e-124	552.923	2.91086e-122
Q33 - Role - Economic development	Tech Procurement Yes vs. No	yes	12	12.6316	no	30	6.45161	4.34268	0.0371684	3.49756	0.0614595
Q33 - Role - Infrastructure planning	Tech Procurement Yes vs. No	yes	22	23.1579	no	69	14.8387	4.01155	0.0451897	3.42355	0.0642726
Q33 - Role - Urban design	Tech Procurement Yes vs. No	yes	26	27.3684	no	79	16.9892	5.57814	0.018186	4.91764	0.0265837
Q33 - Role - Other	Tech Procurement Yes vs. No	yes	18	18.9474	no	47	10.1075	6.00807	0.0142406	5.17737	0.022883
Q2A - Software - Presentations	Greater than 10 years experience vs. less than 10 years	less than 10	96	80.6723	more than 10	201	91.7808	8.92653	0.00281058	7.91475	0.00490334
Q2D - Software - Programming Languages	Greater than 10 years experience vs. less than 10 years	less than 10	17	14.2857	more than 10	15	6.84932	4.97464	0.0257215	4.14486	0.0417611
Q4 - Data Access - External consultants	Greater than 10 years experience vs. less than 10 years	less than 10	52	43.6975	more than 10	121	55.2511	4.11924	0.0423981	3.66981	0.0554065
Q29 - Institution - Other	Greater than 10 years experience vs. less than 10 years	less than 10	5	4.20168	more than 10	2	0.913242	4.11113	0.0426019	2.64958	0.103577
Q32 - Tech Experience Procurement	Greater than 10 years experience vs. less than 10 years	less than 10	14	11.7647	more than 10	47	21.4612	4.90147	0.0268338	4.2678	0.0388413

## Sheet: 4 - Chi Sq (3+ Groups)
Question Abbreviated	Test Name	Group 1 Name	Group 1 Response No.	% of Group 1	Group 2 Name	Group 2 Response No.	% of Group 2	Group 3 Name	Group 3 Response No.	% of Group 3	Group 4 Name	Group 4 Response No.	% of Group 4	Group 5 Name	Group 5 Response No.	% of Group 5	Chi-Square	Chi-Square p-value
Q2A - Software - Word Processing	Surveyed Countries	Australia	165	97.0588	New Zealand	157	100	United Kingdom	58	100	United States of America	64	95.5224	Canada	91	100	11.2651	0.0237406
Q2A - Software - Presentations	Surveyed Countries	Australia	138	81.1765	New Zealand	124	78.9809	United Kingdom	51	87.931	United States of America	63	94.0299	Canada	87	95.6044	19.3667	0.000665691
Q2A - Software - Social Media Platforms	Surveyed Countries	Australia	93	54.7059	New Zealand	44	28.0255	United Kingdom	33	56.8966	United States of America	38	56.7164	Canada	50	54.9451	33.7742	8.29021e-07
Q2A - Software - Website Editing	Surveyed Countries	Australia	27	15.8824	New Zealand	12	7.64331	United Kingdom	10	17.2414	United States of America	22	32.8358	Canada	21	23.0769	24.2471	7.12609e-05
Q2A - Software - Graphics And Design	Surveyed Countries	Australia	65	38.2353	New Zealand	41	26.1146	United Kingdom	15	25.8621	United States of America	33	49.2537	Canada	56	61.5385	37.6902	1.2982e-07
Q2B - Software - Digital Twins / 3D City Viewers	Surveyed Countries	Australia	18	10.5882	New Zealand	5	3.18471	United Kingdom	9	15.5172	United States of America	5	7.46269	Canada	3	3.2967	14.4657	0.00594801
Q2B - Software - Geographic Information Systems	Surveyed Countries	Australia	103	60.5882	New Zealand	123	78.3439	United Kingdom	37	63.7931	United States of America	54	80.597	Canada	71	78.022	19.8336	0.000538611
Q2B - Software - 3D Model Making	Surveyed Countries	Australia	23	13.5294	New Zealand	12	7.64331	United Kingdom	7	12.069	United States of America	16	23.8806	Canada	28	30.7692	27.6787	1.44897e-05
Q2C - Software - Development App. Management	Surveyed Countries	Australia	70	41.1765	New Zealand	36	22.9299	United Kingdom	35	60.3448	United States of America	18	26.8657	Canada	29	31.8681	31.7483	2.15357e-06
Q2C - Software - ePlans	Surveyed Countries	Australia	86	50.5882	New Zealand	124	78.9809	United Kingdom	21	36.2069	United States of America	15	22.3881	Canada	17	18.6813	112.897	1.75381e-23
Q2C - Software - DisciplineAnalytical Software	Surveyed Countries	Australia	16	9.41176	New Zealand	31	19.7452	United Kingdom	14	24.1379	United States of America	19	28.3582	Canada	12	13.1868	16.9781	0.00195195
Q2C - Software - Scenario and Forecasting	Surveyed Countries	Australia	5	2.94118	New Zealand	4	2.54777	United Kingdom	3	5.17241	United States of America	10	14.9254	Canada	4	4.3956	18.1526	0.00115215
Q2D - Software - Data Portals	Surveyed Countries	Australia	76	44.7059	New Zealand	43	27.3885	United Kingdom	40	68.9655	United States of America	26	38.806	Canada	48	52.7473	35.7927	3.19222e-07
Q2D - Software - Data Visualisation	Surveyed Countries	Australia	32	18.8235	New Zealand	14	8.9172	United Kingdom	11	18.9655	United States of America	22	32.8358	Canada	24	26.3736	21.9506	0.000205005
Q2D - Software - Programming Languages	Surveyed Countries	Australia	8	4.70588	New Zealand	6	3.82166	United Kingdom	3	5.17241	United States of America	12	17.9104	Canada	12	13.1868	20.0107	0.000496983
Q2D - Software - Machine Learning / AI	Surveyed Countries	Australia	6	3.52941	New Zealand	3	1.91083	United Kingdom	1	1.72414	United States of America	7	10.4478	Canada	2	2.1978	11.7515	0.0192983
Q3A - Data - Development Reg. Or Policy	Surveyed Countries	Australia	156	91.7647	New Zealand	150	95.5414	United Kingdom	49	84.4828	United States of America	57	85.0746	Canada	84	92.3077	10.4276	0.0338083
Q3A - Data - Property And Development Data	Surveyed Countries	Australia	150	88.2353	New Zealand	145	92.3567	United Kingdom	45	77.5862	United States of America	56	83.5821	Canada	83	91.2088	11.0599	0.0258988
Q3A - Data - Real Estate Data	Surveyed Countries	Australia	70	41.1765	New Zealand	39	24.8408	United Kingdom	22	37.931	United States of America	35	52.2388	Canada	43	47.2527	21.1812	0.000291517
Q3A - Data - Employment And Business Data	Surveyed Countries	Australia	76	44.7059	New Zealand	34	21.6561	United Kingdom	26	44.8276	United States of America	36	53.7313	Canada	43	47.2527	31.4741	2.45005e-06
Q3B - Data - Demographic Data	Surveyed Countries	Australia	127	74.7059	New Zealand	84	53.5032	United Kingdom	37	63.7931	United States of America	59	88.0597	Canada	79	86.8132	46.5424	1.89904e-09
Q3B - Data - Community Consultation	Surveyed Countries	Australia	96	56.4706	New Zealand	69	43.949	United Kingdom	30	51.7241	United States of America	29	43.2836	Canada	71	78.022	31.1722	2.82355e-06
Q3B - Data - First peoples/indigenous	Surveyed Countries	Australia	65	38.2353	New Zealand	68	43.3121	United Kingdom	2	3.44828	United States of America	13	19.403	Canada	51	56.044	54.0499	5.13767e-11
Q3B - Data - Social Media Data	Surveyed Countries	Australia	33	19.4118	New Zealand	13	8.28025	United Kingdom	12	20.6897	United States of America	16	23.8806	Canada	34	37.3626	31.4343	2.49631e-06
Q3B - Data - Public Heath Data	Surveyed Countries	Australia	22	12.9412	New Zealand	14	8.9172	United Kingdom	9	15.5172	United States of America	22	32.8358	Canada	21	23.0769	24.3047	6.93901e-05
Q3C - Data - Natural Hazards Data	Surveyed Countries	Australia	133	78.2353	New Zealand	140	89.172	United Kingdom	42	72.4138	United States of America	44	65.6716	Canada	70	76.9231	18.7829	0.000867023
Q4 - Data Access - Own analysis	Surveyed Countries	Australia	69	40.5882	New Zealand	40	25.4777	United Kingdom	18	31.0345	United States of America	37	55.2239	Canada	48	52.7473	28.4248	1.02292e-05
Q29 - Institution - Regional government	Surveyed Countries	Australia	1	0.588235	New Zealand	13	8.28025	United Kingdom	0	0	United States of America	8	11.9403	Canada	9	9.89011	21.509	0.000250944
Q29 - Institution - State government	Surveyed Countries	Australia	22	12.9412	New Zealand	0	0	United Kingdom	0	0	United States of America	8	11.9403	Canada	7	7.69231	28.656	9.18163e-06
Q29 - Institution - National or central government	Surveyed Countries	Australia	1	0.588235	New Zealand	15	9.55414	United Kingdom	7	12.069	United States of America	1	1.49254	Canada	4	4.3956	21.076	0.000305872
Q29 - Institution - Private sector	Surveyed Countries	Australia	84	49.4118	New Zealand	76	48.4076	United Kingdom	22	37.931	United States of America	17	25.3731	Canada	27	29.6703	20.176	0.000460998
Q29 - Institution - Not-for-profit or charity	Surveyed Countries	Australia	6	3.52941	New Zealand	4	2.54777	United Kingdom	3	5.17241	United States of America	11	16.4179	Canada	5	5.49451	19.7952	0.000548096
Q32 - Tech Experience Database	Surveyed Countries	Australia	51	30	New Zealand	49	31.2102	United Kingdom	26	44.8276	United States of America	36	53.7313	Canada	44	48.3516	20.0262	0.00049348
Q32 - Teach Experience GIS	Surveyed Countries	Australia	92	54.1176	New Zealand	84	53.5032	United Kingdom	38	65.5172	United States of America	53	79.1045	Canada	71	78.022	27.8906	1.31263e-05
Q32 - Tech Experience Procurement	Surveyed Countries	Australia	26	15.2941	New Zealand	14	8.9172	United Kingdom	11	18.9655	United States of America	20	29.8507	Canada	23	25.2747	19.7134	0.000568841
Q33 - Role - Development assessment	Surveyed Countries	Australia	82	48.2353	New Zealand	100	63.6943	United Kingdom	23	39.6552	United States of America	13	19.403	Canada	36	39.5604	41.4444	2.17456e-08
Q33 - Role - Strategic planning / Policy	Surveyed Countries	Australia	102	60	New Zealand	70	44.586	United Kingdom	29	50	United States of America	30	44.7761	Canada	62	68.1319	18.0472	0.00120818
Q33 - Role - Economic development	Surveyed Countries	Australia	11	6.47059	New Zealand	1	0.636943	United Kingdom	6	10.3448	United States of America	9	13.4328	Canada	15	16.4835	24.8256	5.45391e-05
Q33 - Role - Other	Surveyed Countries	Australia	14	8.23529	New Zealand	11	7.00637	United Kingdom	12	20.6897	United States of America	13	19.403	Canada	12	13.1868	14.1583	0.00680662
Q2A - Software - Word Processing	Public vs. Private vs. Non Profit	public_sector	280	99.6441	private_sector	215	99.0783	non_profit	32	94.1176							9.95111	0.00690468
Q2A - Software - Spreadsheets	Public vs. Private vs. Non Profit	public_sector	271	96.4413	private_sector	201	92.6267	non_profit	29	85.2941							8.46463	0.0145187
Q2A - Software - Presentations	Public vs. Private vs. Non Profit	public_sector	253	90.0356	private_sector	177	81.5668	non_profit	29	85.2941							7.44733	0.0241453
Q2A - Software - Video Conferencing Software	Public vs. Private vs. Non Profit	public_sector	279	99.2883	private_sector	214	98.6175	non_profit	30	88.2353							22.4905	1.30691e-05
Q2A - Software - Social Media Platforms	Public vs. Private vs. Non Profit	public_sector	101	35.9431	private_sector	130	59.9078	non_profit	26	76.4706							39.6965	2.39887e-09
Q2A - Software - Administrative Systems	Public vs. Private vs. Non Profit	public_sector	151	53.7367	private_sector	69	31.7972	non_profit	9	26.4706							28.1098	7.87102e-07
Q2A - Software - Online Whiteboard	Public vs. Private vs. Non Profit	public_sector	54	19.2171	private_sector	58	26.7281	non_profit	15	44.1176							11.9929	0.00248762
Q2A - Software - Website Editing	Public vs. Private vs. Non Profit	public_sector	47	16.726	private_sector	32	14.7465	non_profit	12	35.2941							8.81287	0.0121986
Q2A - Software - Graphics And Design	Public vs. Private vs. Non Profit	public_sector	95	33.8078	private_sector	93	42.8571	non_profit	17	50							6.24954	0.0439471
Q2B - Software - Geographic Information Systems	Public vs. Private vs. Non Profit	public_sector	221	78.6477	private_sector	141	64.977	non_profit	22	64.7059							12.4065	0.00202284
Q2B - Software - 3D Model Making	Public vs. Private vs. Non Profit	public_sector	29	10.3203	private_sector	42	19.3548	non_profit	12	35.2941							18.2872	0.000106899
Q2B - Software - Augmented/Virtual Reality	Public vs. Private vs. Non Profit	public_sector	2	0.711744	private_sector	4	1.84332	non_profit	4	11.7647							20.0929	4.33403e-05
Q2C - Software - Development App. Management	Public vs. Private vs. Non Profit	public_sector	130	46.2633	private_sector	48	22.1198	non_profit	10	29.4118							31.7936	1.24771e-07
Q2C - Software - ePlans	Public vs. Private vs. Non Profit	public_sector	123	43.7722	private_sector	130	59.9078	non_profit	12	35.2941							15.814	0.000368148
Q2C - Software - Community Engagement	Public vs. Private vs. Non Profit	public_sector	87	30.9609	private_sector	53	24.424	non_profit	16	47.0588							8.03723	0.0179779
Q2C - Software - Scenario and Forecasting	Public vs. Private vs. Non Profit	public_sector	14	4.98221	private_sector	10	4.60829	non_profit	6	17.6471							9.8745	0.00717429
Q2D - Software - Data Visualisation	Public vs. Private vs. Non Profit	public_sector	55	19.573	private_sector	34	15.6682	non_profit	13	38.2353							9.72136	0.00774523
Q2D - Software - Machine Learning / AI	Public vs. Private vs. Non Profit	public_sector	5	1.77936	private_sector	8	3.68664	non_profit	5	14.7059							15.6064	0.000408425
Q2D - Software - Other	Public vs. Private vs. Non Profit	public_sector	10	3.55872	private_sector	3	1.38249	non_profit	4	11.7647							10.4967	0.00525625
Q3A - Data - Development Reg. Or Policy	Public vs. Private vs. Non Profit	public_sector	253	90.0356	private_sector	211	97.235	non_profit	28	82.3529							14.4854	0.000715375
Q3A - Data - Property And Development Data	Public vs. Private vs. Non Profit	public_sector	246	87.5445	private_sector	202	93.0876	non_profit	26	76.4706							9.83503	0.0073173
Q3B - Data - Cultural Heritage Data	Public vs. Private vs. Non Profit	public_sector	185	65.8363	private_sector	162	74.6544	non_profit	17	50							10.1108	0.00637469
Q3B - Data - Public Heath Data	Public vs. Private vs. Non Profit	public_sector	43	15.3025	private_sector	31	14.2857	non_profit	11	32.3529							7.34945	0.0253563
Q3C - Data - Climate Change Data	Public vs. Private vs. Non Profit	public_sector	107	38.0783	private_sector	83	38.2488	non_profit	21	61.7647							7.41632	0.0245226
Q4 - Data Access - External consultants	Public vs. Private vs. Non Profit	public_sector	155	55.1601	private_sector	118	54.3779	non_profit	8	23.5294							12.534	0.0018979
Q2 - Data Access - Internal GIS team	Public vs. Private vs. Non Profit	public_sector	223	79.3594	private_sector	93	42.8571	non_profit	16	47.0588							73.1861	1.28188e-16
Q3 - Data Access - Existing websites etc.	Public vs. Private vs. Non Profit	public_sector	244	86.8327	private_sector	204	94.0092	non_profit	27	79.4118							10.2936	0.00581793
Q29 - Institution - Local government	Public vs. Private vs. Non Profit	public_sector	210	74.7331	private_sector	17	7.8341	non_profit	12	35.2941							222.841	4.08008e-49
Q29 - Institution - Regional government	Public vs. Private vs. Non Profit	public_sector	23	8.18505	private_sector	4	1.84332	non_profit	6	17.6471							16.6395	0.000243655
Q29 - Institution - State government	Public vs. Private vs. Non Profit	public_sector	34	12.0996	private_sector	3	1.38249	non_profit	4	11.7647							20.613	3.3415e-05
Q29 - Institution - National or central government	Public vs. Private vs. Non Profit	public_sector	23	8.18505	private_sector	3	1.38249	non_profit	2	5.88235							11.3916	0.00336013
Q29 - Institution - Intergovernmental	Public vs. Private vs. Non Profit	public_sector	0	0	private_sector	1	0.460829	non_profit	3	8.82353							32.0598	1.09218e-07
Q29 - Institution - Private sector	Public vs. Private vs. Non Profit	public_sector	0	0	private_sector	217	100	non_profit	15	44.1176							497.914	7.57558e-109
Q29 - Institution - Not-for-profit or charity	Public vs. Private vs. Non Profit	public_sector	0	0	private_sector	0	0	non_profit	29	85.2941							449.254	2.79066e-98
Q29 - Institution - Social enterprise	Public vs. Private vs. Non Profit	public_sector	0	0	private_sector	0	0	non_profit	7	20.5882							103.896	2.74896e-23
Q29 - Institution - Academia	Public vs. Private vs. Non Profit	public_sector	6	2.13523	private_sector	4	1.84332	non_profit	7	20.5882							35.5531	1.90438e-08
Q33 - Role - Development assessment	Public vs. Private vs. Non Profit	public_sector	112	39.8577	private_sector	130	59.9078	non_profit	8	23.5294							27.7882	9.24441e-07
Q33 - Role - Strategic planning / Policy	Public vs. Private vs. Non Profit	public_sector	164	58.363	private_sector	103	47.4654	non_profit	22	64.7059							7.43816	0.0242563
Q33 - Role - Natural area / Environmental	Public vs. Private vs. Non Profit	public_sector	37	13.1673	private_sector	36	16.5899	non_profit	15	44.1176							21.0464	2.69053e-05

## Sheet: 4 - SW MCA Eigenvalues
Dimensionension	Eigen Value	% of Variance	Cumulative % of Variance
Dimension 1	0.12467	12.467	12.467
Dimension 2	0.0849651	8.49651	20.9635
Dimension 3	0.0597413	5.97413	26.9377
Dimension 4	0.0508666	5.08666	32.0243
Dimension 5	0.0445745	4.45745	36.4818
Dimension 6	0.0406223	4.06223	40.544
Dimension 7	0.0388663	3.88663	44.4306
Dimension 8	0.0367704	3.67704	48.1077
Dimension 9	0.0349011	3.49011	51.5978
Dimension 10	0.0325303	3.25303	54.8508
Dimension 11	0.0320252	3.20252	58.0533
Dimension 12	0.0307155	3.07155	61.1249
Dimension 13	0.0289056	2.89056	64.0155
Dimension 14	0.0277227	2.77227	66.7877
Dimension 15	0.0273915	2.73915	69.5269
Dimension 16	0.0248552	2.48552	72.0124
Dimension 17	0.0242248	2.42248	74.4349
Dimension 18	0.0232521	2.32521	76.7601
Dimension 19	0.0226285	2.26285	79.0229
Dimension 20	0.0217735	2.17735	81.2003
Dimension 21	0.0215768	2.15768	83.358
Dimension 22	0.0205761	2.05761	85.4156
Dimension 23	0.0196636	1.96636	87.3819
Dimension 24	0.0188849	1.88849	89.2704
Dimension 25	0.0187353	1.87353	91.144
Dimension 26	0.0178384	1.78384	92.9278
Dimension 27	0.0168849	1.68849	94.6163
Dimension 28	0.0161087	1.61087	96.2271
Dimension 29	0.015513	1.5513	97.7785
Dimension 30	0.0118845	1.18845	98.9669
Dimension 31	0.010331	1.0331	100

## Sheet: 5 - SW MCA Dim1
Categorical Variable	Variable Type	Estimate	p-value
Q2B - Software - Augmented/Virtual Reality	Contributing	0.602598	9.06511e-33
Q2D - Software - Machine Learning / AI	Contributing	0.470172	4.799e-34
Q2C - Software - Scenario and Forecasting	Contributing	0.459084	3.09099e-45
Q2D - Software - Programming Languages	Contributing	0.371625	2.06167e-45
Q2C - Software - Building Information Modelling	Contributing	0.343352	3.78568e-23
Q29 - Institution - Intergovernmental	Supplementary/Explanatory	0.306339	0.000104417
Q29 - Institution - Social enterprise	Supplementary/Explanatory	0.285508	1.89242e-05
Q2B - Software - Digital Twins / 3D City Viewers	Contributing	0.281677	3.13023e-24
Q36 - Professional Organisation Member	Supplementary/Explanatory	0.276367	0.00266315
Q2C - Software - Other	Contributing	0.227284	2.41439e-08
Q2B - Software - 3D Model Making	Contributing	0.219516	5.8081e-29
Q2D - Software - Data Visualisation	Contributing	0.215708	1.69534e-32
Q2B - Software - Other	Contributing	0.210082	2.95559e-11
Q2C - Software - DisciplineAnalytical Software	Contributing	0.205766	9.27442e-27
Not Q35 - Gender	Supplementary/Explanatory	0.201036	0.0495376
Q2D - Software - Other	Contributing	0.191178	9.68533e-06
Q2C - Software - Development Feasibility	Contributing	0.183151	7.71033e-06
Q2A - Software - Presentations	Contributing	0.181383	1.80429e-18
Q2A - Software - Website Editing	Contributing	0.181034	1.35934e-20
Q2A - Software - Word Processing	Contributing	0.180962	0.00394927
Q2A - Software - Online Whiteboard	Contributing	0.179814	7.69294e-26
Q2A - Software - Project Management	Contributing	0.17354	5.51633e-30
Q32 - Tech Experience Programming	Supplementary/Explanatory	0.172803	5.03593e-14
Q29 - Institution - Academia	Supplementary/Explanatory	0.171974	4.0214e-07
Q2A - Software - Social Media Platforms	Contributing	0.163383	4.37237e-30
Q2A - Software - Spreadsheets	Contributing	0.162992	2.78947e-08
Q2A - Software - Graphics And Design	Contributing	0.152169	1.37342e-24
Q33 - Role - Transport planning	Supplementary/Explanatory	0.150861	8.78434e-11
Q32 - Tech Experience Procurement	Supplementary/Explanatory	0.150602	1.24996e-14
Q33 - Role - Economic development	Supplementary/Explanatory	0.146774	1.70528e-07
Q1 - Country - United States of America	Supplementary/Explanatory	0.139021	1.81937e-05
Q34 - Seniority - Management	Supplementary/Explanatory	0.138327	0.0057742
Q2A - Software - Other	Contributing	0.136502	1.55411e-13
Q2A - Software - Video Conferencing Software	Contributing	0.13347	0.00283969
Q34 - Seniority - Director	Supplementary/Explanatory	0.131321	0.00633665
Q2D - Software - Data Portals	Contributing	0.127558	7.96342e-18
Q33 - Role - Infrastructure planning	Supplementary/Explanatory	0.123892	9.56059e-10
Q2C - Software - Community Engagement	Contributing	0.119251	1.75685e-13
Not Q29 - Institution - Not-for-profit or charity	Supplementary/Explanatory	0.115014	0.00061713
Q32 - Tech Experience Database	Supplementary/Explanatory	0.110177	5.58688e-13
Q2C - Software - Automated Documents	Contributing	0.109863	1.25446e-05
Q29 - Institution - Regional government	Supplementary/Explanatory	0.108225	0.000888706
Q32 - Teach Experience GIS	Supplementary/Explanatory	0.104727	8.46659e-12
Q2B - Software - Geographic Information Systems	Contributing	0.101751	7.36672e-10
Q2C - Software - Automated Approvals	Contributing	0.100583	0.000238292
Q29 - Institution - State government	Supplementary/Explanatory	0.0954248	0.0014658
Q2B - Software - Online Mapping / Virtual Globe	Contributing	0.0830445	0.000296361
Q33 - Role - Urban design	Supplementary/Explanatory	0.0802455	4.21008e-05
Q33 - Role - Natural area / Environmental	Supplementary/Explanatory	0.0783121	0.000105038
Not Q33 - Role - Development assessment	Supplementary/Explanatory	0.0763688	3.81531e-07
Q33 - Role - Strategic planning / Policy	Supplementary/Explanatory	0.0701419	3.31851e-06
Q1 - Country - Canada	Supplementary/Explanatory	0.049584	0.0144021
Q29 - Institution - Private sector	Supplementary/Explanatory	0.0447168	0.00356712
Q35 - Gender	Supplementary/Explanatory	0.0365187	0.0013459
Not Q29 - Institution - Local government	Supplementary/Explanatory	0.0348442	0.022672
Q2A - Software - Administrative Systems	Contributing	0.0329406	0.0316137
Not Q2A - Software - Administrative Systems	Contributing	-0.0329406	0.0316137
Q29 - Institution - Local government	Supplementary/Explanatory	-0.0348442	0.022672
Not Q29 - Institution - Private sector	Supplementary/Explanatory	-0.0447168	0.00356712
Q35 - Gender - Woman	Supplementary/Explanatory	-0.068255	0.00075805
Not Q33 - Role - Strategic planning / Policy	Supplementary/Explanatory	-0.0701419	3.31851e-06
Q33 - Role - Development assessment	Supplementary/Explanatory	-0.0763688	3.81531e-07
Not Q33 - Role - Natural area / Environmental	Supplementary/Explanatory	-0.0783121	0.000105038
Not Q33 - Role - Urban design	Supplementary/Explanatory	-0.0802455	4.21008e-05
Not Q2B - Software - Online Mapping / Virtual Globe	Contributing	-0.0830445	0.000296361
Not Q29 - Institution - State government	Supplementary/Explanatory	-0.0954248	0.0014658
Not Q2C - Software - Automated Approvals	Contributing	-0.100583	0.000238292
Not Q2B - Software - Geographic Information Systems	Contributing	-0.101751	7.36672e-10
Not Q32 - Teach Experience GIS	Supplementary/Explanatory	-0.104727	8.46659e-12
Not Q29 - Institution - Regional government	Supplementary/Explanatory	-0.108225	0.000888706
Not Q2C - Software - Automated Documents	Contributing	-0.109863	1.25446e-05
Not Q32 - Tech Experience Database	Supplementary/Explanatory	-0.110177	5.58688e-13
Not Q29 - Institution - Not-for-profit or charity	Supplementary/Explanatory	-0.115014	0.00061713
Not Q2C - Software - Community Engagement	Contributing	-0.119251	1.75685e-13
Not Q33 - Role - Infrastructure planning	Supplementary/Explanatory	-0.123892	9.56059e-10
Not Q2D - Software - Data Portals	Contributing	-0.127558	7.96342e-18
Not Q2A - Software - Video Conferencing Software	Contributing	-0.13347	0.00283969
Not Q2A - Software - Other	Contributing	-0.136502	1.55411e-13
Not Q33 - Role - Economic development	Supplementary/Explanatory	-0.146774	1.70528e-07
Not Q32 - Tech Experience Procurement	Supplementary/Explanatory	-0.150602	1.24996e-14
Not Q33 - Role - Transport planning	Supplementary/Explanatory	-0.150861	8.78434e-11
Not Q2A - Software - Graphics And Design	Contributing	-0.152169	1.37342e-24
Q1 - Country - New Zealand	Supplementary/Explanatory	-0.15343	3.08919e-07
Not Q2A - Software - Spreadsheets	Contributing	-0.162992	2.78947e-08
Not Q2A - Software - Social Media Platforms	Contributing	-0.163383	4.37237e-30
Not Q29 - Institution - Academia	Supplementary/Explanatory	-0.171974	4.0214e-07
Not Q32 - Tech Experience Programming	Supplementary/Explanatory	-0.172803	5.03593e-14
Not Q2A - Software - Project Management	Contributing	-0.17354	5.51633e-30
Not Q2A - Software - Online Whiteboard	Contributing	-0.179814	7.69294e-26
Not Q2A - Software - Word Processing	Contributing	-0.180962	0.00394927
Not Q2A - Software - Website Editing	Contributing	-0.181034	1.35934e-20
Not Q2A - Software - Presentations	Contributing	-0.181383	1.80429e-18
Not Q2C - Software - Development Feasibility	Contributing	-0.183151	7.71033e-06
Not Q2D - Software - Other	Contributing	-0.191178	9.68533e-06
Not Q2C - Software - DisciplineAnalytical Software	Contributing	-0.205766	9.27442e-27
Not Q2B - Software - Other	Contributing	-0.210082	2.95559e-11
Not Q2D - Software - Data Visualisation	Contributing	-0.215708	1.69534e-32
Not Q2B - Software - 3D Model Making	Contributing	-0.219516	5.8081e-29
Not Q34 - Seniority	Supplementary/Explanatory	-0.223131	0.0208912
Not Q2C - Software - Other	Contributing	-0.227284	2.41439e-08
Not Q35 - Gender	Supplementary/Explanatory	-0.257133	0.029518
Not Q2B - Software - Digital Twins / 3D City Viewers	Contributing	-0.281677	3.13023e-24
Not Q29 - Institution - Social enterprise	Supplementary/Explanatory	-0.285508	1.89242e-05
Not Q29 - Institution - Intergovernmental	Supplementary/Explanatory	-0.306339	0.000104417
Not Q2C - Software - Building Information Modelling	Contributing	-0.343352	3.78568e-23
Not Q2D - Software - Programming Languages	Contributing	-0.371625	2.06167e-45
Not Q36 - Professional Organisation Member	Supplementary/Explanatory	-0.38569	0.00014795
Not Q2C - Software - Scenario and Forecasting	Contributing	-0.459084	3.09099e-45
Not Q2D - Software - Machine Learning / AI	Contributing	-0.470172	4.799e-34
Not Q2B - Software - Augmented/Virtual Reality	Contributing	-0.602598	9.06511e-33

## Sheet: 6 - SW MCA Dim2
Categorical Variable	Variable Type	Estimate	p-value
Q2A - Software - Word Processing	Contributing	-0.859029	1.74721e-84
Q2A - Software - Video Conferencing Software	Contributing	-0.610502	6.81254e-84
Q36 - Professional Organisation Member	Supplementary/Explanatory	-0.459856	1.49433e-09
Q2A - Software - Spreadsheets	Contributing	-0.327365	1.03429e-48
Not Q2B - Software - Augmented/Virtual Reality	Contributing	-0.277251	2.19394e-10
Not Q2D - Software - Machine Learning / AI	Contributing	-0.265307	1.16023e-15
Not Q2C - Software - Building Information Modelling	Contributing	-0.24721	1.28513e-17
Q2B - Software - Online Mapping / Virtual Globe	Contributing	-0.221863	8.61567e-36
Q35 - Gender - Woman	Supplementary/Explanatory	-0.214875	0.000826719
Not Q29 - Institution - Social enterprise	Supplementary/Explanatory	-0.205501	0.000197967
Q2A - Software - Presentations	Contributing	-0.186799	5.27102e-29
Not Q2B - Software - Digital Twins / 3D City Viewers	Contributing	-0.139953	3.08799e-09
Not Q2C - Software - Scenario and Forecasting	Contributing	-0.124401	1.92962e-05
Not Q2D - Software - Programming Languages	Contributing	-0.116913	6.22572e-07
Q2B - Software - Geographic Information Systems	Contributing	-0.09203	1.27722e-11
Not Q2D - Software - Other	Contributing	-0.084321	0.0188555
Q2C - Software - Development App. Management	Contributing	-0.0804587	5.10991e-10
Q2A - Software - Administrative Systems	Contributing	-0.0801079	1.19966e-10
Q2C - Software - Automated Approvals	Contributing	-0.0762571	0.000748329
Not Q29 - Institution - Not-for-profit or charity	Supplementary/Explanatory	-0.0676671	0.0149481
Not Q32 - Tech Experience Programming	Supplementary/Explanatory	-0.0621182	0.00132576
Q2C - Software - Community Engagement	Contributing	-0.0570838	2.66616e-05
Not Q29 - Institution - Academia	Supplementary/Explanatory	-0.0567711	0.0448093
Q29 - Institution - Local government	Supplementary/Explanatory	-0.0483725	0.000118438
Q33 - Role - Strategic planning / Policy	Supplementary/Explanatory	-0.0480092	0.000121422
Not Q2C - Software - DisciplineAnalytical Software	Contributing	-0.0461185	0.00561395
Q2C - Software - ePlans	Contributing	-0.0403274	0.0012361
Q2D - Software - Data Portals	Contributing	-0.040204	0.00142689
Q32 - Tech Experience GIS	Supplementary/Explanatory	-0.0384212	0.00285144
Q2A - Software - Graphics And Design	Contributing	-0.0368212	0.00408669
Q2A - Software - Social Media Platforms	Contributing	-0.0316527	0.0114414
Not Q2A - Software - Social Media Platforms	Contributing	0.0316527	0.0114414
Not Q2A - Software - Graphics And Design	Contributing	0.0368212	0.00408669
Not Q32 - Teach Experience GIS	Supplementary/Explanatory	0.0384212	0.00285144
Not Q2D - Software - Data Portals	Contributing	0.040204	0.00142689
Not Q2C - Software - ePlans	Contributing	0.0403274	0.0012361
Q2C - Software - Discipline Analytical Software	Contributing	0.0461185	0.00561395
Not Q33 - Role - Strategic planning / Policy	Supplementary/Explanatory	0.0480092	0.000121422
Not Q29 - Institution - Local government	Supplementary/Explanatory	0.0483725	0.000118438
Q29 - Institution - Academia	Supplementary/Explanatory	0.0567711	0.0448093
Not Q2C - Software - Community Engagement	Contributing	0.0570838	2.66616e-05
Q32 - Tech Experience Programming	Supplementary/Explanatory	0.0621182	0.00132576
Not Q29 - Institution - Not-for-profit or charity	Supplementary/Explanatory	0.0676671	0.0149481
Not Q2C - Software - Automated Approvals	Contributing	0.0762571	0.000748329
Not Q2A - Software - Administrative Systems	Contributing	0.0801079	1.19966e-10
Not Q2C - Software - Development App. Management	Contributing	0.0804587	5.10991e-10
Q2D - Software - Other	Contributing	0.084321	0.0188555
Not Q2B - Software - Geographic Information Systems	Contributing	0.09203	1.27722e-11
Q2D - Software - Programming Languages	Contributing	0.116913	6.22572e-07
Q2C - Software - Scenario and Forecasting	Contributing	0.124401	1.92962e-05
Q2B - Software - Digital Twins / 3D City Viewers	Contributing	0.139953	3.08799e-09
Not Q2A - Software - Presentations	Contributing	0.186799	5.27102e-29
Q29 - Institution - Social enterprise	Supplementary/Explanatory	0.205501	0.000197967
Not Q2B - Software - Online Mapping / Virtual Globe	Contributing	0.221863	8.61567e-36
Q2C - Software - Building Information Modelling	Contributing	0.24721	1.28513e-17
Q2D - Software - Machine Learning / AI	Contributing	0.265307	1.16023e-15
Q2B - Software - Augmented/Virtual Reality	Contributing	0.277251	2.19394e-10
Not Q2A - Software - Spreadsheets	Contributing	0.327365	1.03429e-48
Not Q2A - Software - Video Conferencing Software	Contributing	0.610502	6.81254e-84
Not Q35 - Gender	Supplementary/Explanatory	0.754081	1.62065e-26
Not Q36 - Professional Organisation Member	Supplementary/Explanatory	0.834854	1.80907e-35
Not Q2A - Software - Word Processing	Contributing	0.859029	1.74721e-84
Not Q34 - Seniority	Supplementary/Explanatory	0.917236	2.52531e-33
